# Supplementary material
Source: PubMed Central journal article supplement (PMC3712755)
Supplement: NIHMS488520-supplement-001.pdf [file NIHMS488520-supplement-001.pdf]

## SUPPORTING INFORMATION

### **Intermediate P\* from Soluble Methane Monooxygenase Contains a Diferrous Cluster**

Rahul Banerjee<sup>†</sup>, Katlyn K. Meier<sup>§</sup>, Eckard Münck<sup>\*§</sup>, and John D. Lipscomb<sup>\*†</sup>

*<sup>†</sup>Department of Biochemistry, Molecular Biology and Biophysics and Center for Metals in Biocatalysis, University of Minnesota, Minneapolis, Minnesota 55455, United States*

*<sup>§</sup>Department of Chemistry, Carnegie Mellon University, Pittsburgh, Pennsylvania 15213, United States*

#### **Corresponding Authors**

\*E.M.: Department of Chemistry, Carnegie Mellon University, 4400 Fifth Ave., Pittsburgh, PA 15213; email, EMunck@cmu.edu; phone, (412) 268-5058. J.D.L.: Department of Biochemistry, Molecular Biology, and Biophysics, 6-155 Jackson Hall, University of Minnesota, 321 Church St. SE, Minneapolis, MN 55455; phone, (612) 625-6454; fax, (612) 624-5121; e-mail,

[Lipsc001@umn.edu](mailto:Lipsc001@umn.edu)

**Table S1.** Characteristics of the reaction cycle intermediates of the *M. trichosporium* diferrrous MMOH-MMOB single turnover cycle.<sup>a,b</sup>

| Intermediate           | Nature of the diiron cluster                                                                                                         | Evidence                                                                                                                                                                                                                                                                                                                                                                                                                                                                                                                                                                                                                                                                                             |
|------------------------|--------------------------------------------------------------------------------------------------------------------------------------|------------------------------------------------------------------------------------------------------------------------------------------------------------------------------------------------------------------------------------------------------------------------------------------------------------------------------------------------------------------------------------------------------------------------------------------------------------------------------------------------------------------------------------------------------------------------------------------------------------------------------------------------------------------------------------------------------|
| <b>H<sup>red</sup></b> | Fe <sup>II</sup> Fe <sup>II</sup> cluster, ferromagnetically coupled                                                                 | Characteristic EPR signal at $g = 16$<br>Mössbauer spectrum in a strong applied magnetic field shows two sites with 1:1 site ratio                                                                                                                                                                                                                                                                                                                                                                                                                                                                                                                                                                   |
| <b>O</b>               | Fe <sup>II</sup> Fe <sup>II</sup> cluster, ferromagnetically coupled with O <sub>2</sub> bond in the active site                     | Same spectral features as <b>H<sup>red</sup></b> .<br>The apparent rate constant for decay of the $g = 16$ signal is independent of the O <sub>2</sub> concentration, implying that an irreversibly formed intermediate occurs between <b>H<sup>red</sup></b> and <b>P*</b> or <b>P</b> .                                                                                                                                                                                                                                                                                                                                                                                                            |
| <b>P*</b>              | Shown here to be an Fe <sup>II</sup> Fe <sup>II</sup> cluster, but distinct from <b>O</b>                                            | Mössbauer spectra demonstrate that the cluster is diferrrous; it lacks, however, the $g = 16$ EPR signal. A small change in the exchange coupling between <b>P*</b> and <b>H<sup>red</sup></b> or <b>O</b> may account for the disappearance of the $g = 16$ signal. The decay rate constant for <b>O</b> is much faster than the formation rate constant for <b>P</b> , indicating that there must be an intermediate between <b>O</b> and <b>P</b> .                                                                                                                                                                                                                                               |
| <b>P</b>               | Cis $\mu$ -peroxo Fe <sup>III</sup> Fe <sup>III</sup> cluster with the antiferromagnetically coupled irons                           | The optical spectrum of <b>P</b> at 700 nm can be observed. It has much faster formation than decay rate constants, and it breaks down to yield <b>Q</b> . The Mössbauer spectrum of <b>P</b> shows that the irons are ferric and antiferromagnetically coupled. The isomer shift of <b>P</b> is larger than that of <b>H<sup>ox</sup></b> .                                                                                                                                                                                                                                                                                                                                                         |
| <b>Q</b>               | Bis- $\mu$ -oxo Fe <sup>IV</sup> Fe <sup>IV</sup> cluster, antiferromagnetically coupled                                             | Mössbauer spectra reveal an antiferromagnetically coupled Fe <sup>IV</sup> Fe <sup>IV</sup> cluster comprising high-spin Fe <sup>IV</sup> sites. EXAFS analysis reveals a short Fe-Fe distance, consistent with a diamond core structure. The kinetics of the reaction can be monitored using the intense yellow color of <b>Q</b> . <b>Q</b> forms with the same rate constant as <b>P</b> decays. The rate constant for <b>Q</b> decay depends on the concentration of added substrate, suggesting that it is the reactive intermediate of the cycle. The <b>Q</b> reaction with methane shows a deuterium kinetic isotope effect of ~50 suggesting that a tunneling reaction mechanism dominates. |
| <b>R</b>               | Too short-lived to be trapped. Thought to be an Fe <sup>III</sup> Fe <sup>IV</sup> -OH cluster with a substrate radical bound nearby | <sup>1</sup> H, <sup>2</sup> H, <sup>3</sup> H-Chiral ethane shows ~70 % racemization during reaction with <b>Q</b> to form ethanol, requiring a radical intermediate with a very short lifetime. Similar results were obtained using radical clock substrates and by observing the desaturation chemistry.                                                                                                                                                                                                                                                                                                                                                                                          |
| <b>T</b>               | Fe <sup>III</sup> Fe <sup>III</sup> cluster with product bound to the cluster or nearby                                              | Substrates that form chromophoric products show that product formation is faster than product release, thereby requiring a discrete product complex. All rate constants for the formation and decay of intermediates between <b>H<sup>red</sup></b> and <b>R</b> exceed the turnover number for methane and other substrates, implying a product complex with rate limiting product release.                                                                                                                                                                                                                                                                                                         |

<sup>a</sup> Compiled from references<sup>1-12</sup>

<sup>b</sup> Comparable intermediates have been described for the *Methylococcus capsulatus* Bath soluble methane monooxygenase system.<sup>13</sup>

## Supplemental Results

**Fourier Transform Treated Spectra of Figure 7.** Briefly, a Mössbauer spectrum is the convolution of a source line shape [a Lorentzian of  $\sim 0.12$  mm/s full width with our current  $^{57}\text{Co}(\text{Rh})$  source] with the spectrum of the absorber. By the convolution theorem, the Fourier transform of a Mössbauer spectrum is the product of the transforms of the source (known) and the absorber (the desired quantity). By removing the source contribution in the time-domain and back-transforming we obtain, in the ideal case, the spectrum of the absorber as it would appear if the source would not contribute to the line width. In practice, experimental noise requires filtering the data in the time domain, which yields some distortion of the lines; for details see references.<sup>14,15</sup> The Fourier transform treated spectra presented here (Figure S1) yield rather precise line positions. A line that is substantially broadened by heterogeneities (e.g. a distribution in  $\Delta E_Q$ ) will narrow very little by this treatment. The colored arrows indicate the positions of the two lines belonging to each identified species; this analysis shows that all species present have been identified.

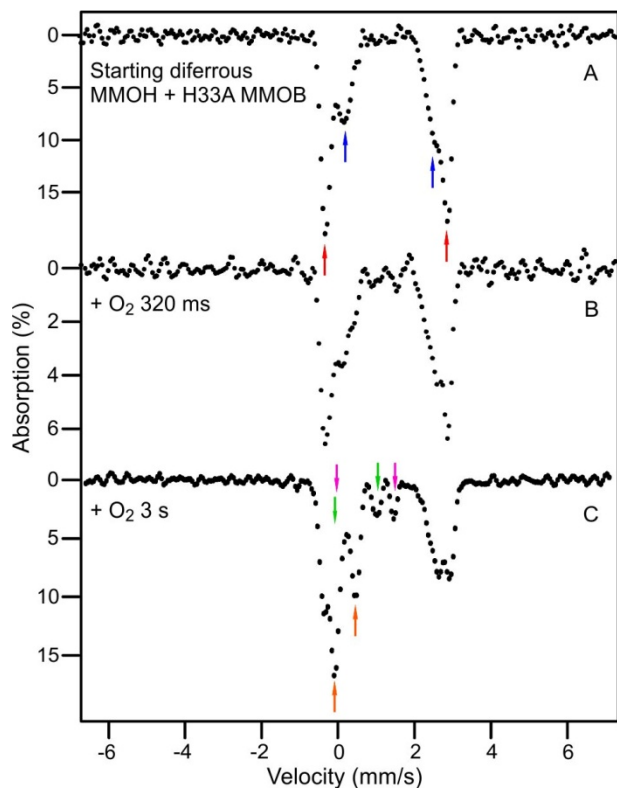

**Figure S1.** Fourier transform treated data of the spectra shown in Figure 7 (panels A, B, and C) of the main text. The colored arrows mark the two lines of each assigned quadrupole doublet. Sites 1 and 2 of  $\mathbf{H}^{\text{red}}$  (red and blue, respectively); intermediates  $\mathbf{P}$  (magenta) and  $\mathbf{Q}$  (orange) and  $\mathbf{H}^{\text{ox}}$  (green). Intensities are obtained from fitting the original spectra of Figure 7 using the constrained line positions. The spectrum of (A) shows that site 2 (blue arrows) is heterogeneously broadened and contributes a single (broadened) doublet rather than two doublets with sharp lines and different quadrupole splittings.

### Supplemental References

(1) Fox, B. G., Froland, W. A., Dege, J. E., and Lipscomb, J. D. (1989) Methane monooxygenase from *Methylosinus trichosporium* OB3b. Purification and properties of a three-

component system with high specific activity from a type II methanotroph. *J. Biol. Chem.* 264, 10023-10033.

(2) Fox, B. G., Hendrich, M. P., Surerus, K. K., Andersson, K. K., Froland, W. A., Lipscomb, J. D., and Münck, E. (1993) Mössbauer, EPR, and ENDOR studies of the hydroxylase and reductase components of methane monooxygenase from *Methylosinus trichosporium* OB3b. *J. Am. Chem. Soc.* 115, 3688-3701.

(3) Hendrich, M. P., Münck, E., Fox, B. G., and Lipscomb, J. D. (1990) Integer-spin EPR studies of the fully reduced methane monooxygenase hydroxylase component. *J. Am. Chem. Soc.* 112, 5861-5865.

(4) Lee, S. K., Fox, B. G., Froland, W. A., Lipscomb, J. D., and Münck, E. (1993) A transient intermediate of the methane monooxygenase catalytic cycle containing an Fe(IV)Fe(IV) cluster. *J. Am. Chem. Soc.* 115, 6450-6451.

(5) Lee, S.-K., Nesheim, J. C., and Lipscomb, J. D. (1993) Transient intermediates of the methane monooxygenase catalytic cycle. *J. Biol. Chem.* 268, 21569-21577.

(6) Lee, S.-K., and Lipscomb, J. D. (1999) Oxygen activation catalyzed by methane monooxygenase hydroxylase component: proton delivery during the O-O bond cleavage steps. *Biochemistry* 38, 4423-4432.

(7) Nesheim, J. C., and Lipscomb, J. D. (1996) Large isotope effects in methane oxidation catalyzed by methane monooxygenase: evidence for C-H bond cleavage in a reaction cycle intermediate. *Biochemistry* 35, 10240-10247.

(8) Wallar, B. J., and Lipscomb, J. D. (1996) Dioxygen activation by enzymes containing binuclear non-heme iron clusters. *Chem. Rev.* 96, 2625-2657.

(9) Jin, Y., and Lipscomb, J. D. (2000) Mechanistic insights into C-H activation from radical clock chemistry: Oxidation of substituted methylcyclopropanes catalyzed by soluble methane monooxygenase from *Methylosinus trichosporium* OB3b. *Biochim. Biophys. Acta* 1543, 47-59.

(10) Brazeau, B. J., Wallar, B. J., and Lipscomb, J. D. (2001) Unmasking of deuterium kinetic isotope effects on the methane monooxygenase compound Q reaction by site-directed mutagenesis of component B. *J. Am. Chem. Soc.* 123, 10421-10422.

(11) Wallar, B. J., and Lipscomb, J. D. (2001) Methane monooxygenase component B mutants alter the kinetics of steps throughout the catalytic cycle. *Biochemistry* 40, 2220-2233.

(12) Zhang, J., Wallar, B. J., Popescu, C. V., Renner, D. B., Thomas, D. D., and Lipscomb, J. D. (2006) Methane monooxygenase hydroxylase and B component interactions. *Biochemistry* 45, 2913-2926.

(13) Tinberg, C. E., and Lippard, S. J. (2011) Dioxygen activation in soluble methane monooxygenase. *Acc. Chem. Res.* 44, 280-288.

(14) Dibar-Ure, M. C., and Flinn, P. A. (1971) A technique for the removal of the "blackness" distortion of Mössbauer spectra, in *Mössbauer Effect Methodology* (Gruverman, I. G., Ed.), pp 245-262, Plenum Press, New York, N.Y.

(15) Dunham, W. R., Harding, L. J., and Sands, R. H. (1993) Mössbauer spectroscopy of metalloproteins and the use of Fourier transforms. *Eur. J. Biochem.* 214, 1-8.
